# Supplementary material for: Yinqin Qingfei granules alleviate Mycoplasma pneumoniae pneumonia via inhibiting NLRP3 inflammasome-mediated macrophage pyroptosis
Source: Front Pharmacol. 2024 Aug 27;15:1437475. doi: 10.3389/fphar.2024.1437475 (PMC11383775; doi:10.3389/fphar.2024.1437475)
Supplement: Supplementary file 1 [file DataSheet3.XLSX]

## Sheet: All ingredients in YQQFG
No.	Components	Mol ID	OB (%)	Class	m/z	RT (s)	Exact mass	Error (ppm)	Formula	Precursor type	CAS	pos/neg	Sample_1	Sample_2	Sample_3	Sample_4	Sample_5	Sample_6	Mean peak area
1	Skullcapflavone II	MOL002927	69.51	flavonoids	375.107	435.9	374.1	1.53556	C19H18O8	[M+H]+	55084-08-7	pos	2.03779e+10	2.37714e+10	2.24185e+10	2.34696e+10	2.34582e+10	2.31393e+10	2.27725e+10
2	Resveratrol	MOL012744	19.07	non-flavonoid phenolic compounds	229.085	285.8	228.079	1.64131	C14H12O3	[M+H]+	501-36-0	pos	1.03955e+10	8.669e+09	9.74472e+09	9.55625e+09	9.90137e+09	8.82415e+09	9.51516e+09
3	Erucic acid	MOL001631	28.56	organic acids	338.342	680.1	338.318	2.27666	C22H42O2	[M]+	112-86-7	pos	1.84843e+09	6.58318e+08	1.43368e+10	3.56422e+09	2.26176e+09	2.91423e+09	4.26395e+09
4	Palmitic acid	MOL000069	19.3	organic acids	255.233	651.9	256.24	0.689566	C16H32O2	[M-H]-	57-10-3	neg	4.50029e+07	8.02065e+08	1.07429e+09	1.16577e+09	1.45255e+09	1.35043e+09	9.81683e+08
5	Baicalein	MOL002714	33.52	flavonoids	271.059	428.7	270.053	3.96962	C15H10O5	[M+H]+	192224-98-9/491-67-8	pos	2.55731e+09	7.71404e+08	5.8647e+08	4.72165e+08	3.71623e+08	3.29614e+08	8.48097e+08
6	Apigenin	MOL000008	23.06	flavonoids	269.042	425.3	270.053	11.9024	C15H10O5	[M-H]-	520-36-5	neg	5.37562e+08	5.73717e+08	4.89578e+08	1.46647e+09	8.20554e+08	1.12891e+09	8.36132e+08
7	Formononetin	MOL000392	69.67	flavonoids	267.067	403.1	268.074	0.318144	C16H12O4	[M-H]-	485-72-3	neg	3.51863e+08	3.37232e+08	3.60165e+08	3.71773e+08	4.19788e+08	4.21986e+08	3.77134e+08
8	Luteolin	MOL000006	36.16	flavonoids	285.04	391.8	286.048	2.54	C15H10O6	[M-H]-	491-70-3	neg	2.03551e+08	2.01447e+08	2.46749e+08	2.15745e+08	3.00913e+08	2.90761e+08	2.43194e+08
9	Quercetin	MOL000098	46.43	flavonoids	303.049	275.4	302.043	3.88056	C15H10O7	[M+H]+	522-12-3	pos	2.12621e+08	2.32396e+08	2.34131e+08	2.44389e+08	2.25999e+08	2.18932e+08	2.28078e+08
10	Gallic acid	MOL000513	31.69	organic acids	169.014	49.6	170.022	2.50867	C7H6O5	[M-H]-	149-91-7	neg	2.06244e+08	1.64302e+08	2.25018e+08	2.28269e+08	2.605e+08	2.81312e+08	2.27607e+08
11	Naringenin	MOL004328	59.29	flavonoids	271.061	369.4	272.068	0.279112	C15H12O5	[M-H]-	480-41-1	neg	2.95262e+08	1.8262e+08	2.09369e+08	2.03934e+08	2.33667e+08	2.36194e+08	2.26841e+08
12	Quinic acid	MOL003069	55.92	organic acids	191.056	69.2	192.063	0.125618	C7H12O6	[M-H]-	77-95-2	neg	2.16941e+08	1.79043e+08	1.88855e+08	1.98545e+08	2.40815e+08	2.65773e+08	2.14995e+08
13	Luteolin 7-O-glucuronide	MOL009070	2.62	flavonoids	461.071	254	462.08	2.43779	C21H18O12	[M-H]-	29741-10-4	neg	1.67353e+08	1.50485e+08	1.49425e+08	1.5819e+08	1.96973e+08	1.79927e+08	1.67059e+08
14	Tyrosol	MOL002930	33.81	phenolic compounds	121.066	57.7	138.068	6.14668	C8H10O2	[M+H-H2O]+	501-94-0	pos	1.79088e+08	1.94694e+08	4.62953e+07	1.72559e+08	1.85395e+08	1.90216e+08	1.61375e+08
15	7-Methylcapillarisin	MOL008044	5.08	flavonoids	315.086	380.7	314.079	0.0761696	C17H14O6	[M+H]+	6601-62-3	pos	1.03344e+08	1.49447e+08	1.23216e+08	1.3608e+08	1.43248e+08	1.78478e+08	1.38969e+08
16	Nonanoic acid	MOL003050	40.51	organic acids	158.153	580.6	158.131	1.70685	C9H18O2	[M]+	112-05-0	pos	6.96291e+07	3.58426e+08	1.22449e+08	8.50455e+07	2.77347e+07	2.39933e+07	1.14546e+08
17	Medicarpin	MOL002565	49.22	flavonoids	271.097	428.9	270.089	0.826273	C16H14O4	[M+H]+	32383-76-9	pos	1.0315e+08	1.13161e+08	1.15085e+08	1.06667e+08	1.1304e+08	1.2098e+08	1.12014e+08
18	Daidzein	MOL000390	19.44	flavonoids	253.05	330.1	254.058	0.885199	C15H10O4	[M-H]-	486-66-8	neg	8.66813e+07	7.4581e+07	1.0323e+08	7.69423e+07	1.04713e+08	1.01739e+08	9.13144e+07
19	beta-Asarone	MOL002124	35.61	terpenoids	209.117	440.4	208.11	0.592969	C12H16O3	[M+H]+	5273-86-9	pos	6.0674e+07	1.05308e+08	7.99244e+07	1.12881e+08	1.14474e+08	7.39792e+07	9.12068e+07
20	Naringenin 7-O-beta-D-glucoside	MOL009072	9.33	flavonoids	433.114	272.9	434.121	0.517185	C21H22O10	[M-H]-	529-55-5	neg	6.49619e+07	6.2109e+07	8.53605e+07	8.30016e+07	9.13044e+07	9.95944e+07	8.10553e+07
21	Stearic acid	MOL000860	17.83	organic acids	265.149	576.3	284.272	3.58296	C18H36O2	[M-H2O-H]-	57-11-4 / 646-29-7	neg	1.68186e+08	9.79295e+07	4.68677e+07	2.98775e+07	7.8188e+07	4.14969e+07	7.70909e+07
22	Pulegone	MOL001972	51.6	terpenoids	153.127	249.5	152.12	0.094781	C10H16O	[M+H]+	89-82-7	pos	7.31077e+07	7.36392e+07	7.33188e+07	7.29276e+07	7.09235e+07	7.35245e+07	7.29069e+07
23	Salicylic acid	MOL001801	32.13	organic acids	137.025	509.9	138.032	4.9334	C7H6O3	[M-H]-	69-72-7	neg	1.33145e+07	4.92506e+07	2.33583e+08	1.86483e+07	1.90241e+07	5.16635e+07	6.42473e+07
24	Azelaic acid	MOL001314	16.9	organic acids	187.1	457.4	188.105	2.77781	C9H16O4	[M-H]-	123-99-9	neg	2.47543e+07	7.52267e+07	2.44575e+07	8.20015e+07	7.31453e+07	2.89618e+07	5.14245e+07
25	Uridine	MOL000059	10.49	nucleosides	243.061	56.4	244.07	2.61426	C9H12N2O6	[M-H]-	58-96-8	neg	4.32576e+07	4.44899e+07	4.86329e+07	4.59832e+07	5.22487e+07	6.00693e+07	4.91136e+07
26	Linoleic acid	MOL000131	41.9	organic acids	263.236	611.8	280.24	10.766	C18H32O2	[M+H-H2O]+	60-33-3	pos	4.37586e+07	2.84856e+07	1.07428e+08	7.4584e+07	1.54859e+07	5.7152e+06	4.59096e+07
27	Dodecanoic acid	MOL000305	23.59	organic acids	200.165	360.2	200.178	5.48815	C12H24O2	[M]+	143-07-7	pos	4.25928e+07	4.79363e+07	4.53681e+07	4.38633e+07	4.74419e+07	4.48742e+07	4.53461e+07
28	Rutin	MOL000415	3.2	flavonoids	609.143	256.2	610.153	4.47186	C27H30O16	[M-H]-	207671-50-9	neg	5.33527e+07	4.30163e+07	3.53863e+07	4.80675e+07	2.72627e+07	5.3887e+07	4.34954e+07
29	Quercetin 3-O-glucoside	MOL000437	1.86	flavonoids	465.107	275.4	464.096	9.29678	C21H20O12	[M+H]+	c("21637-25-2", "482-35-9")	pos	1.33489e+07	1.88976e+07	7.45214e+07	6.95711e+07	6.14759e+07	1.79087e+07	4.26206e+07
30	Eucalyptol	MOL000122	39.73	terpenoids	154.134	47.9	154.136	12.3269	C10H18O	[M]+	470-82-6	pos	3.11039e+07	4.16595e+07	3.88192e+07	3.65607e+07	4.44776e+07	4.10104e+07	3.89385e+07
31	Genistein	MOL000481	17.93	flavonoids	270.049	613.8	270.053	1.38925	C15H10O5	[M]-	446-72-0	neg	3.56472e+06	3.01911e+07	5.47371e+07	6.17401e+06	5.78065e+07	5.56e+07	3.46789e+07
32	Mannitol	MOL000003	17.73	sugar alcohols	183.102	309.6	182.079	2.00097	C6H14O6	[M+H]+	69-65-8	pos	3.19616e+07	3.6678e+07	3.46937e+07	3.26423e+07	3.283e+07	3.21836e+07	3.34982e+07
33	Chlorogenic acid	MOL001955	11.93	organic acids	337.092	259.5	354.095	14.0436	C16H18O9	[M+H-H2O]+	327-97-9 / 327-97-9 202650-88-2	pos	3.39434e+07	9.12698e+06	4.06094e+07	4.0959e+07	3.63183e+07	3.46564e+07	3.26023e+07
34	Eugenol	MOL000254	56.24	phenylpropanoids	165.091	425.6	164.084	0.0146189	C10H12O2	[M+H]+	97-53-0	pos	5.49317e+07	2.28493e+07	2.2503e+07	3.22052e+07	2.38679e+07	3.19277e+07	3.13808e+07
35	Rhamnetin	MOL005889	2.4	flavonoids	317.064	407.6	316.058	4.33982	C16H12O7	[M+H]+	90-19-7	pos	9.74579e+06	3.38142e+07	3.28135e+07	3.59886e+07	3.977e+07	2.04404e+07	2.87621e+07
36	Naringin	MOL005812	6.92	flavonoids	579.172	280	580.179	0.476542	C27H32O14	[M-H]-	10236-47-2	neg	2.34751e+07	2.36934e+07	2.6666e+07	2.73878e+07	2.81255e+07	2.82818e+07	2.62716e+07
37	Nonadecanoic acid	MOL005971	17.21	organic acids	297.243	572.6	298.287	3.1182	C19H38O2	[M-H]-	646-30-0	neg	6.37966e+06	6.59486e+06	8.87296e+06	6.95976e+06	5.10545e+07	5.0256e+07	2.16863e+07
38	Choline	MOL000394	0.47	organic base	104.107	617.7	104.108	1.9211	C5H14NO	[M+H]+	62-49-7	pos	6.68702e+06	2.57557e+07	7.9754e+06	4.78559e+07	3.37478e+07	5.78729e+06	2.13015e+07
39	Myristic acid	MOL001393	21.18	organic acids	227.202	592.1	228.209	0.334505	C14H28O2	[M-H]-	544-63-8	neg	2.05437e+06	1.83349e+07	2.37845e+07	1.28095e+07	3.5449e+07	3.22626e+07	2.07825e+07
40	beta-Caryophyllene	MOL000036	29.7	terpenoids	205.196	643.8	204.188	2.33738	C15H24	[M+H]+	87-44-5	pos	5.00114e+06	2.42489e+07	2.20376e+07	2.43752e+07	2.47375e+07	2.36638e+07	2.06774e+07
41	Pentadecanoic acid	MOL001396	20.18	organic acids	241.217	621.4	242.225	1.26111	C15H30O2	[M-H]-	1002-84-2	neg	5.51274e+06	7.4048e+06	1.77131e+07	6.77038e+06	4.20969e+07	4.16736e+07	2.01953e+07
42	Benzaldehyde	MOL000708	32.63	aldehydes	107.049	227.9	106.042	0.00100233	C7H6O	[M+H]+	100-52-7	pos	5.06903e+06	2.21896e+07	2.20397e+07	2.29419e+07	2.03658e+07	2.19975e+07	1.91006e+07
43	Arachidic acid	MOL000012	16.66	organic acids	311.169	684.9	312.303	2.26245	C20H40O2	[M-H]-	506-30-9	neg	4.53846e+06	1.22006e+07	3.09435e+07	6.33573e+06	3.25339e+07	2.75814e+07	1.90223e+07
44	4-Hydroxycinnamic acid	MOL000771	43.29	organic acids	163.04	77.7	164.047	1.51579	C9H8O3	[M-H]-	7400-08-0 / 7400-08-0 501-98-4 / 501-98-4	neg	1.66077e+07	1.57068e+07	1.83758e+07	1.70674e+07	2.2072e+07	2.35787e+07	1.89014e+07
45	beta-Cubebene	MOL000266	32.81	terpenoids	205.196	623.8	204.188	3.57905	C15H24	[M+H]+	13744-15-5	pos	4.30126e+06	4.21461e+06	1.96897e+07	4.10313e+07	2.08635e+07	1.72029e+07	1.78839e+07
46	Stigmasterol	MOL000449	43.83	steroids	395.366	637.4	412.37	5.56447	C29H48O	[M+H-H2O]+	83-48-7	pos	2.88726e+06	4.38825e+06	2.73628e+06	5.96289e+07	1.44546e+07	1.17059e+07	1.59669e+07
47	Perillyl alcohol	MOL001694	46.24	terpenoids	135.117	449.9	152.12	2.2203	C10H16O	[M+H-H2O]+	536-59-4/18457-55-1	pos	1.96712e+07	1.76477e+07	2.15214e+07	2.00122e+07	4.59089e+06	4.14435e+06	1.4598e+07
48	Isorhamnetin	MOL000354	49.6	flavonoids	317.066	273.1	316.058	0.0610178	C16H12O7	[M+H]+	480-19-3	pos	2.06797e+07	5.67801e+06	6.37892e+06	6.09204e+06	2.40927e+07	2.29922e+07	1.43189e+07
49	Adenosine	MOL006946	19.85	nucleosides	266.089	91.9	267.097	3.38233	C10H13N5O4	[M-H]-	58-61-7	neg	1.10979e+07	1.08201e+07	1.0467e+07	1.15086e+07	1.10268e+07	1.36269e+07	1.14246e+07
50	Hesperetin	MOL002341	70.31	flavonoids	302.075	389.7	302.079	2.54199	C16H14O6	[M]-	520-33-2	neg	9.87895e+06	9.9427e+06	1.04271e+07	1.09528e+07	1.32134e+07	1.26091e+07	1.11707e+07
51	Citric acid	MOL001456	56.22	organic acids	191.02	111.5	192.027	1.96838	C6H8O7	[M-H]-	77-92-9/126-44-3	neg	1.08849e+07	5.85897e+06	3.79858e+06	3.12492e+06	2.67075e+06	3.27189e+06	4.935e+06
52	Caprylic acid	MOL000303	16.4	organic acids	125.097	72.9	144.115	3.11758	C8H16O2	[M-H2O-H]-	124-07-2	neg	6.27985e+06	6.58304e+06	1.07487e+06	6.80281e+06	1.32414e+06	7.09037e+06	4.85918e+06
